# Supplementary material
Source: PubMed Central journal article supplement (PMC7423775)
Supplement: mmc1.pdf [file mmc1.pdf]

**Supplementary materials for “Estimating the impact of physical distancing measures in containing COVID-19: an empirical analysis”**

**Table S1. Physical distancing measures**

| Physical distancing measure          | No. of countries with measures | Average date of implementation | Average days after 1 <sup>st</sup> case | Average days after 100 <sup>th</sup> case |
|--------------------------------------|--------------------------------|--------------------------------|-----------------------------------------|-------------------------------------------|
| Restrictions on international travel | 167                            | February 22, 2020              | -10.8                                   | -33.4                                     |
| Cancel public events                 | 165                            | March 11, 2020                 | 8.3                                     | -14.6                                     |
| School closures                      | 167                            | March 12, 2020                 | 9.3                                     | -13.5                                     |
| Restrictions on size of gatherings   | 157                            | March 17, 2020                 | 13.8                                    | -9.1                                      |
| Workplace closures                   | 155                            | March 17, 2020                 | 14.9                                    | -7.6                                      |
| Restrictions on internal movement    | 155                            | March 19, 2020                 | 16.6                                    | -6.2                                      |
| Stay-at-home orders                  | 152                            | March 22, 2020                 | 18.5                                    | -5.0                                      |
| Public transport closures            | 130                            | March 22, 2020                 | 18.5                                    | -4.0                                      |

Author’s calculations based on the Oxford COVID-19 Government Response Tracker (OxCGRT). Data of 170 countries as of May 28, 2020.

**Table S2. Pairwise correlation of physical distancing measures**

|                                        | I     | II    | III   | IV    | V     | VI    | VII   | VIII |
|----------------------------------------|-------|-------|-------|-------|-------|-------|-------|------|
| I. School closure                      | 1     |       |       |       |       |       |       |      |
| II. Workplace closure                  | 0.552 | 1     |       |       |       |       |       |      |
| III. Cancel public events              | 0.711 | 0.474 | 1     |       |       |       |       |      |
| IV. Size restriction on gathering      | 0.534 | 0.489 | 0.617 | 1     |       |       |       |      |
| V. Public transport closure            | 0.404 | 0.534 | 0.408 | 0.450 | 1     |       |       |      |
| VI. Stay-at-home order                 | 0.445 | 0.635 | 0.437 | 0.548 | 0.604 | 1     |       |      |
| VII. Internal movement restriction     | 0.502 | 0.575 | 0.533 | 0.592 | 0.631 | 0.689 | 1     |      |
| VIII. International travel restriction | 0.475 | 0.342 | 0.502 | 0.464 | 0.450 | 0.432 | 0.512 | 1    |

Author’s calculations based on the Oxford COVID-19 Government Response Tracker (OxCGRT). Data of 170 countries as of May 28, 2020.

**Table S3. Estimated impact of the type of physical distancing measures on COVID-19 transmission**

|                                      | (1)                    | (2)                    | (3)                   | (4)                    |
|--------------------------------------|------------------------|------------------------|-----------------------|------------------------|
| Restrictions on international travel |                        |                        |                       |                        |
| 1                                    | -0.2287<br>(0.2299)    |                        |                       | -0.3312<br>(0.2209)    |
| 2                                    | -0.4322<br>(0.5014)    |                        |                       | -0.5259<br>(0.4968)    |
| 3                                    | 0.3088<br>(0.2759)     |                        |                       | 0.3184<br>(0.2813)     |
| 4                                    | -0.3192<br>(0.2371)    |                        |                       | -0.2829<br>(0.2319)    |
| 5                                    | -0.1270<br>(0.182)     |                        |                       | -0.0403<br>(0.1795)    |
| 6                                    | -0.2306<br>(0.1636)    |                        |                       | -0.1872<br>(0.1674)    |
| 7                                    | -0.4069**<br>(0.1618)  |                        |                       | -0.2500<br>(0.1731)    |
| 8                                    | -0.5393***<br>(0.1691) |                        |                       | -0.3815**<br>(0.1775)  |
| Restrictions on mass gatherings      |                        |                        |                       |                        |
| 1                                    |                        | -0.1673<br>(0.2002)    |                       | -0.0474<br>(0.2043)    |
| 2                                    |                        | N/A                    |                       | N/A                    |
| 3                                    |                        | -0.0738<br>(0.1477)    |                       | 0.1158<br>(0.1810)     |
| 4                                    |                        | -0.3960**<br>(0.1621)  |                       | -0.0997<br>(0.1902)    |
| 5                                    |                        | -0.1712<br>(0.1906)    |                       | 0.0713<br>(0.2198)     |
| 6                                    |                        | -0.5214***<br>(0.1497) |                       | -0.1476<br>(0.2027)    |
| Lockdown                             |                        |                        |                       |                        |
| 1                                    |                        |                        | 0.0769<br>(0.1522)    | -0.1082<br>(0.1742)    |
| 2                                    |                        |                        | -0.5917**<br>(0.2432) | -0.8266***<br>(0.2590) |
| 3                                    |                        |                        | -0.1475<br>(0.1805)   | -0.2515<br>(0.1918)    |
| 4                                    |                        |                        | -0.5442**<br>(0.2190) | -0.4082*<br>(0.2363)   |
| 5                                    |                        |                        | -0.1845<br>(0.1328)   | -0.1395<br>(0.1671)    |

|                         |                        |                        |                        |                        |
|-------------------------|------------------------|------------------------|------------------------|------------------------|
| 6                       |                        |                        | -0.4961***<br>(0.1166) | -0.3690**<br>(0.1591)  |
| In GDP per capita       | -0.0231<br>(0.0396)    | -0.0411<br>(0.041)     | -0.0477<br>(0.0404)    | -0.0647<br>(0.0424)    |
| In population density   | -0.0225<br>(0.0315)    | -0.0207<br>(0.0308)    | -0.0091<br>(0.0296)    | -0.0089<br>(0.0311)    |
| % age 65 in population  | -0.0028<br>(0.0105)    | 0.0033<br>(0.0102)     | 0.0062<br>(0.0100)     | 0.0030<br>(0.0101)     |
| Temperature             | -0.0210***<br>(0.0059) | -0.0197***<br>(0.0054) | -0.0173***<br>(0.0053) | -0.0170***<br>(0.0057) |
| Constant                | 2.6568***<br>(0.3766)  | 2.7066***<br>(0.3933)  | 2.6327***<br>(0.3739)  | 3.0237***<br>(0.4297)  |
| Number of countries     | 142                    | 142                    | 142                    | 142                    |
| R <sup>2</sup>          | 0.334                  | 0.334                  | 0.375                  | 0.470                  |
| Adjusted R <sup>2</sup> | 0.272                  | 0.289                  | 0.327                  | 0.366                  |

The dependent variable is the average  $R_t$  over the 7 days since the date of the 100<sup>th</sup> case.  $R_t$ , the time-varying reproduction number, is the expected number of secondary cases generated by a primary case at time  $t$ . The physical distancing measures are those that are in place on the date of the 100<sup>th</sup> case; refer to Table 1 for the specific measures. Standard errors are in parenthesis. \*\*\*, \*\*, and \* represents statistical significance at the 1%, 5%, and 10% level respectively. N/A denotes not available.

**Table S4. Estimated impact of the type of physical distancing measures on growth of COVID-19 cases**

|                                      | (1)                    | (2)                     | (3)                     | (4)                    |
|--------------------------------------|------------------------|-------------------------|-------------------------|------------------------|
| Restrictions on international travel |                        |                         |                         |                        |
| 1                                    | -11.5241*<br>(6.4055)  |                         |                         | -13.9037**<br>(6.3857) |
| 2                                    | -4.3420<br>(13.9714)   |                         |                         | -6.8805<br>(14.3637)   |
| 3                                    | -3.1768<br>(7.6889)    |                         |                         | -1.5921<br>(8.1343)    |
| 4                                    | -11.5567*<br>(6.6056)  |                         |                         | -9.7012<br>(6.7039)    |
| 5                                    | -6.7669<br>(5.0718)    |                         |                         | -4.3670<br>(5.1914)    |
| 6                                    | -8.9413*<br>(4.5579)   |                         |                         | -6.2495<br>(4.8393)    |
| 7                                    | -14.9550**<br>(4.5095) |                         |                         | -9.4285*<br>(5.0047)   |
| 8                                    | -15.3598**<br>(4.7113) |                         |                         | -9.8495*<br>(5.1321)   |
| Restrictions on mass gatherings      |                        |                         |                         |                        |
| 1                                    |                        | -11.3489**<br>(5.5239)  |                         | -8.0236<br>(5.9083)    |
| 2                                    |                        | N/A                     |                         | N/A                    |
| 3                                    |                        | -6.4666<br>(4.0747)     |                         | -0.1768<br>(5.2319)    |
| 4                                    |                        | -14.0559***<br>(4.4727) |                         | -6.2775<br>(5.4983)    |
| 5                                    |                        | -10.5430**<br>(5.2583)  |                         | -2.8170<br>(6.3564)    |
| 6                                    |                        | -15.9865***<br>(4.1313) |                         | -5.9179<br>(5.8615)    |
| Lockdown                             |                        |                         |                         |                        |
| 1                                    |                        |                         | -3.0011<br>(4.2961)     | -6.9561<br>(5.0370)    |
| 2                                    |                        |                         | -10.9708<br>(6.8614)    | -14.9819**<br>(7.4892) |
| 3                                    |                        |                         | 0.2952<br>(5.0943)      | -2.7972<br>(5.5463)    |
| 4                                    |                        |                         | -16.5760***<br>(6.1800) | -11.5052*<br>(6.8333)  |
| 5                                    |                        |                         | -8.4072**<br>(3.7467)   | -7.0555<br>(4.8320)    |

|                         |                         |                        |                         |                         |
|-------------------------|-------------------------|------------------------|-------------------------|-------------------------|
| 6                       |                         |                        | -12.7560***<br>(3.2912) | -10.0471**<br>(4.5988)  |
| In GDP per capita       | 0.2485<br>(1.1024)      | -0.0591<br>(1.1325)    | -0.4026<br>(1.1398)     | -0.8913<br>(1.2256)     |
| In population density   | 0.0542<br>(0.8772)      | 0.2200<br>(0.8492)     | 0.1598<br>(0.8366)      | 0.3009<br>(0.9004)      |
| % age 65 in population  | -0.0689<br>(0.2924)     | 0.0031<br>(0.2811)     | 0.0784<br>(0.2826)      | 0.0468<br>(0.2917)      |
| Temperature             | -0.4738***<br>(0.1651)  | -0.4930***<br>(0.1483) | -0.4551***<br>(0.1503)  | -0.3903**<br>(0.1643)   |
| Constant                | 27.4590***<br>(10.4931) | 29.1527**<br>(10.8533) | 27.9928**<br>(10.5507)  | 41.3448***<br>(12.4237) |
| Number of countries     | 142                     | 142                    | 142                     | 142                     |
| R <sup>2</sup>          | 0.310                   | 0.323                  | 0.335                   | 0.408                   |
| Adjusted R <sup>2</sup> | 0.245                   | 0.277                  | 0.284                   | 0.293                   |

The dependent variable is the percent increase in total cases over the 14 days since the date of the 100<sup>th</sup> case. The physical distancing measures are those that are in place on the date of the 100<sup>th</sup> case; refer to Table 1 for the specific measures. Standard errors are in parenthesis. \*\*\*, \*\*, and \* represents statistical significance at the 1%, 5%, and 10% level respectively. N/A denotes not available.

**Table S5. Predicted time-varying reproduction numbers on date of the 100<sup>th</sup> case**

| Country                         | SI     | TR | MG | LD | Predicted $R_t$ | Estimated $R_t$<br>using<br>reported data | Difference | Total cases as<br>of May 28,<br>2020 |
|---------------------------------|--------|----|----|----|-----------------|-------------------------------------------|------------|--------------------------------------|
| Madagascar                      | 95.37  | 7  | 4  | 6  | 1.34            | 0.74                                      | -0.60      | 612                                  |
| Japan                           | 25.00  | 6  | 1  | 0  | 1.87            | 1.27                                      | -0.59      | 16,651                               |
| Myanmar                         | 86.11  | 6  | 6  | 6  | 1.31            | 0.74                                      | -0.56      | 206                                  |
| Finland                         | 42.59  | 6  | 3  | 1  | 1.93            | 1.41                                      | -0.52      | 6,692                                |
| Brunei                          | 52.78  | 8  | 4  | 0  | 1.25            | 0.73                                      | -0.52      | 141                                  |
| Ethiopia                        | 73.15  | 4  | 6  | 6  | 1.30            | 0.83                                      | -0.47      | 731                                  |
| Egypt                           | 18.52  | 0  | 0  | 3  | 1.80            | 1.33                                      | -0.47      | 19,666                               |
| Iceland                         | 16.67  | 4  | 0  | 0  | 1.98            | 1.53                                      | -0.45      | 1,805                                |
| Kuwait                          | 74.07  | 7  | 5  | 3  | 1.33            | 0.89                                      | -0.44      | 23,267                               |
| Thailand                        | 33.80  | 3  | 3  | 0  | 1.89            | 1.45                                      | -0.44      | 3,054                                |
| Vietnam                         | 50.00  | 8  | 3  | 5  | 1.51            | 1.10                                      | -0.41      | 327                                  |
| Guam                            | 67.59  | 5  | 6  | 6  | 1.09            | 0.68                                      | -0.41      | 171                                  |
| Greece                          | 40.74  | 0  | 3  | 3  | 1.82            | 1.41                                      | -0.40      | 2,903                                |
| Sweden                          | 0.00   | 0  | 0  | 0  | 2.15            | 1.75                                      | -0.40      | 35,088                               |
| Bahrain                         | 25.00  | 1  | 0  | 0  | 1.47            | 1.10                                      | -0.37      | 9,633                                |
| Eswatini                        | 82.41  | 8  | 4  | 5  | 1.40            | 1.04                                      | -0.36      | 272                                  |
| Slovenia                        | 28.70  | 5  | 4  | 1  | 1.68            | 1.32                                      | -0.36      | 1,471                                |
| Liberia                         | 79.63  | 6  | 6  | 6  | 1.33            | 0.97                                      | -0.36      | 266                                  |
| Iraq                            | 77.78  | 5  | 6  | 5  | 1.58            | 1.22                                      | -0.36      | 5,135                                |
| Aruba                           | 82.41  | 6  | 6  | 6  | 1.09            | 0.74                                      | -0.35      | 101                                  |
| Norway                          | 11.11  | 0  | 0  | 0  | 2.13            | 1.79                                      | -0.34      | 8,383                                |
| Rwanda                          | 100.00 | 8  | 6  | 6  | 1.25            | 0.92                                      | -0.33      | 346                                  |
| Senegal                         | 66.67  | 7  | 6  | 5  | 1.37            | 1.06                                      | -0.32      | 3,253                                |
| Estonia                         | 44.44  | 1  | 3  | 5  | 1.76            | 1.44                                      | -0.32      | 1,840                                |
| Jordan                          | 100.00 | 7  | 5  | 6  | 1.39            | 1.09                                      | -0.30      | 720                                  |
| Trinidad and Tobago             | 79.63  | 8  | 6  | 6  | 0.96            | 0.67                                      | -0.29      | 116                                  |
| Andorra                         | 31.48  | 0  | 1  | 6  | 1.51            | 1.25                                      | -0.26      | 763                                  |
| Kosovo                          | 92.59  | 7  | 6  | 6  | 1.42            | 1.17                                      | -0.25      | 1,047                                |
| Bermuda                         | 96.30  | 8  | 6  | 6  | 0.95            | 0.71                                      | -0.25      | 139                                  |
| Algeria                         | 36.11  | 5  | 3  | 0  | 1.86            | 1.62                                      | -0.24      | 8,857                                |
| Tanzania                        | 46.30  | 8  | 4  | 0  | 1.52            | 1.29                                      | -0.24      | 509                                  |
| Taiwan                          | 27.78  | 8  | 1  | 0  | 1.45            | 1.21                                      | -0.24      | 441                                  |
| Bulgaria                        | 70.37  | 6  | 6  | 6  | 1.49            | 1.26                                      | -0.23      | 2,460                                |
| Russia                          | 60.65  | 6  | 4  | 5  | 2.01            | 1.82                                      | -0.19      | 370,680                              |
| Venezuela                       | 82.41  | 7  | 4  | 6  | 1.09            | 0.90                                      | -0.18      | 1,245                                |
| Cuba                            | 66.67  | 6  | 3  | 5  | 1.61            | 1.43                                      | -0.18      | 1,974                                |
| Uruguay                         | 54.63  | 5  | 3  | 2  | 1.35            | 1.18                                      | -0.16      | 803                                  |
| Mozambique                      | 50.93  | 4  | 4  | 1  | 1.57            | 1.41                                      | -0.16      | 227                                  |
| Slovak Republic                 | 75.00  | 7  | 4  | 4  | 1.36            | 1.21                                      | -0.16      | 1,515                                |
| Ghana                           | 52.78  | 8  | 4  | 0  | 1.36            | 1.23                                      | -0.13      | 7,303                                |
| Burkina Faso                    | 84.26  | 7  | 3  | 6  | 1.36            | 1.23                                      | -0.13      | 845                                  |
| Afghanistan                     | 62.04  | 1  | 3  | 6  | 1.55            | 1.42                                      | -0.13      | 12,456                               |
| Democratic Republic<br>of Congo | 77.78  | 8  | 4  | 6  | 1.22            | 1.09                                      | -0.13      | 2,659                                |
| Kyrgyz Republic                 | 92.13  | 8  | 6  | 6  | 1.46            | 1.33                                      | -0.13      | 1,594                                |
| Mauritius                       | 82.41  | 7  | 3  | 6  | 1.30            | 1.18                                      | -0.12      | 334                                  |
| Azerbaijan                      | 68.52  | 6  | 6  | 5  | 1.67            | 1.56                                      | -0.12      | 4,568                                |
| Hong Kong                       | 45.37  | 6  | 3  | 2  | 1.23            | 1.11                                      | -0.11      | 1,066                                |
| Albania                         | 84.26  | 7  | 4  | 6  | 1.43            | 1.32                                      | -0.10      | 1,050                                |
| San Marino                      | 83.33  | 7  | 6  | 4  | 1.18            | 1.08                                      | -0.10      | 667                                  |
| Bosnia and<br>Herzegovina       | 89.81  | 5  | 6  | 6  | 1.54            | 1.44                                      | -0.10      | 2,435                                |
| Denmark                         | 35.19  | 3  | 3  | 1  | 2.01            | 1.92                                      | -0.10      | 11,480                               |

|                      |        |   |   |   |      |      |       |         |
|----------------------|--------|---|---|---|------|------|-------|---------|
| Tunisia              | 87.96  | 5 | 5 | 6 | 1.51 | 1.41 | -0.10 | 1,051   |
| Georgia              | 100.00 | 8 | 6 | 6 | 1.35 | 1.26 | -0.09 | 735     |
| Pakistan             | 52.78  | 6 | 5 | 0 | 1.85 | 1.76 | -0.09 | 61,227  |
| Niger                | 61.11  | 7 | 4 | 5 | 1.45 | 1.36 | -0.09 | 955     |
| Cape Verde           | 75.93  | 8 | 3 | 6 | 1.32 | 1.24 | -0.09 | 390     |
| Uzbekistan           | 90.74  | 7 | 3 | 6 | 1.60 | 1.52 | -0.09 | 3,333   |
| Lebanon              | 52.78  | 8 | 1 | 4 | 1.21 | 1.13 | -0.08 | 1,161   |
| Qatar                | 30.56  | 6 | 1 | 0 | 1.44 | 1.38 | -0.07 | 48,947  |
| Guyana               | 90.74  | 8 | 6 | 6 | 1.07 | 1.01 | -0.07 | 139     |
| Kazakhstan           | 80.09  | 7 | 6 | 5 | 1.62 | 1.56 | -0.06 | 9,576   |
| Indonesia            | 43.52  | 6 | 3 | 1 | 1.59 | 1.53 | -0.06 | 23,851  |
| India                | 48.15  | 6 | 3 | 1 | 1.65 | 1.60 | -0.05 | 158,333 |
| Argentina            | 88.89  | 7 | 5 | 5 | 1.59 | 1.54 | -0.05 | 13,920  |
| Paraguay             | 93.52  | 7 | 6 | 6 | 1.18 | 1.13 | -0.05 | 884     |
| Kenya                | 83.33  | 8 | 6 | 6 | 1.11 | 1.06 | -0.05 | 1,471   |
| Sri Lanka            | 97.22  | 8 | 6 | 6 | 1.03 | 0.99 | -0.04 | 1,469   |
| Philippines          | 75.00  | 6 | 3 | 5 | 1.63 | 1.60 | -0.03 | 15,049  |
| Bolivia              | 96.30  | 7 | 6 | 6 | 1.27 | 1.24 | -0.03 | 7,768   |
| Canada               | 22.22  | 2 | 3 | 0 | 2.02 | 2.02 | 0.00  | 87,508  |
| Costa Rica           | 71.30  | 7 | 3 | 6 | 1.29 | 1.30 | 0.01  | 984     |
| Czech Republic       | 57.41  | 6 | 3 | 3 | 1.81 | 1.82 | 0.01  | 9,086   |
| United Kingdom       | 11.11  | 0 | 0 | 0 | 2.04 | 2.05 | 0.01  | 267,240 |
| Chile                | 47.22  | 0 | 3 | 5 | 1.86 | 1.87 | 0.01  | 82,289  |
| Congo                | 97.22  | 8 | 4 | 6 | 1.12 | 1.13 | 0.01  | 571     |
| Mexico               | 2.78   | 1 | 0 | 0 | 1.62 | 1.63 | 0.02  | 78,023  |
| United Arab Emirates | 45.37  | 6 | 3 | 2 | 1.15 | 1.17 | 0.03  | 31,969  |
| Peru                 | 94.44  | 7 | 5 | 5 | 1.55 | 1.57 | 0.03  | 135,905 |
| Austria              | 19.44  | 5 | 0 | 0 | 2.02 | 2.05 | 0.03  | 16,515  |
| Puerto Rico          | 93.52  | 6 | 6 | 6 | 1.15 | 1.18 | 0.03  | 3,397   |
| Poland               | 57.41  | 7 | 3 | 3 | 1.76 | 1.81 | 0.04  | 22,473  |
| Cyprus               | 92.59  | 7 | 5 | 6 | 1.30 | 1.35 | 0.04  | 939     |
| Honduras             | 100.00 | 7 | 6 | 6 | 1.21 | 1.26 | 0.04  | 4,640   |
| El Salvador          | 88.89  | 8 | 4 | 6 | 1.07 | 1.12 | 0.05  | 2,109   |
| Mali                 | 72.22  | 5 | 4 | 6 | 1.27 | 1.32 | 0.06  | 1,116   |
| Somalia              | 56.48  | 8 | 4 | 1 | 1.38 | 1.44 | 0.06  | 1,731   |
| Ireland              | 48.15  | 0 | 5 | 1 | 1.73 | 1.79 | 0.06  | 24,803  |
| Netherlands          | 2.78   | 0 | 0 | 1 | 1.88 | 1.95 | 0.06  | 45,768  |
| Serbia               | 81.48  | 8 | 6 | 5 | 1.55 | 1.62 | 0.07  | 11,275  |
| Singapore            | 25.00  | 6 | 1 | 0 | 1.38 | 1.45 | 0.07  | 32,876  |
| South Africa         | 55.56  | 6 | 3 | 1 | 1.64 | 1.71 | 0.07  | 25,937  |
| Romania              | 61.11  | 6 | 4 | 3 | 1.65 | 1.73 | 0.08  | 18,594  |
| Sierra Leone         | 80.56  | 8 | 4 | 6 | 1.17 | 1.26 | 0.09  | 782     |
| Guatemala            | 93.52  | 6 | 6 | 6 | 1.22 | 1.31 | 0.09  | 4,145   |
| Lithuania            | 81.48  | 7 | 6 | 6 | 1.45 | 1.55 | 0.10  | 1,647   |
| Nigeria              | 82.87  | 8 | 6 | 6 | 1.02 | 1.13 | 0.10  | 8,733   |
| South Sudan          | 92.59  | 8 | 6 | 6 | 1.11 | 1.22 | 0.11  | 806     |
| Malaysia             | 22.22  | 6 | 1 | 0 | 1.54 | 1.67 | 0.13  | 7,619   |
| Switzerland          | 25.00  | 0 | 4 | 0 | 1.85 | 1.98 | 0.14  | 30,678  |
| Saudi Arabia         | 68.52  | 7 | 3 | 5 | 1.51 | 1.66 | 0.14  | 78,541  |
| Central African      |        |   |   |   |      |      |       |         |
| Republic             | 68.52  | 8 | 4 | 6 | 1.21 | 1.36 | 0.15  | 702     |
| Hungary              | 67.59  | 7 | 4 | 4 | 1.34 | 1.49 | 0.15  | 3,816   |
| Cote d'Ivoire        | 80.56  | 7 | 4 | 6 | 1.18 | 1.33 | 0.15  | 2,556   |
| Moldova              | 87.04  | 7 | 6 | 6 | 1.44 | 1.60 | 0.16  | 7,537   |
| Morocco              | 90.74  | 7 | 4 | 6 | 1.38 | 1.55 | 0.17  | 7,601   |
| Panama               | 51.85  | 6 | 3 | 1 | 1.51 | 1.69 | 0.18  | 11,728  |
| Cameroon             | 57.41  | 5 | 4 | 4 | 1.25 | 1.43 | 0.19  | 5,436   |
| Uganda               | 87.04  | 6 | 4 | 6 | 1.39 | 1.58 | 0.19  | 281     |

|                    |       |   |   |   |      |      |      |           |
|--------------------|-------|---|---|---|------|------|------|-----------|
| Gabon              | 87.04 | 8 | 6 | 6 | 1.03 | 1.22 | 0.19 | 2,319     |
| New Zealand        | 75.93 | 8 | 6 | 5 | 1.36 | 1.56 | 0.20 | 1,154     |
| Belgium            | 13.89 | 1 | 0 | 0 | 1.76 | 1.97 | 0.21 | 57,592    |
| Guinea             | 73.15 | 7 | 4 | 6 | 1.22 | 1.44 | 0.22 | 3,446     |
| Croatia            | 66.67 | 8 | 5 | 6 | 1.40 | 1.63 | 0.23 | 2,244     |
| Nepal              | 92.59 | 8 | 6 | 6 | 1.30 | 1.54 | 0.24 | 886       |
| Luxembourg         | 79.63 | 0 | 6 | 6 | 1.44 | 1.68 | 0.25 | 4,001     |
| Colombia           | 50.93 | 3 | 4 | 2 | 1.31 | 1.56 | 0.25 | 24,104    |
| Australia          | 19.44 | 6 | 0 | 0 | 1.63 | 1.89 | 0.26 | 7,139     |
| Belarus            | 8.33  | 5 | 0 | 0 | 2.06 | 2.32 | 0.26 | 38,956    |
| Palestine          | 94.44 | 7 | 6 | 6 | 1.27 | 1.54 | 0.26 | 613       |
| Brazil             | 42.13 | 3 | 3 | 1 | 1.77 | 2.06 | 0.29 | 411,821   |
| Ukraine            | 88.89 | 7 | 6 | 6 | 1.48 | 1.77 | 0.29 | 21,584    |
| Zambia             | 65.28 | 8 | 6 | 5 | 1.44 | 1.74 | 0.30 | 1,057     |
| France             | 19.44 | 4 | 3 | 0 | 1.87 | 2.21 | 0.34 | 145,746   |
| Ecuador            | 93.52 | 7 | 3 | 5 | 1.59 | 1.94 | 0.34 | 38,103    |
| Chad               | 88.89 | 8 | 4 | 6 | 1.09 | 1.45 | 0.36 | 715       |
| Benin              | 59.72 | 4 | 6 | 5 | 1.41 | 1.78 | 0.37 | 339       |
| Portugal           | 32.41 | 5 | 0 | 3 | 1.77 | 2.14 | 0.37 | 31,292    |
| Jamaica            | 78.70 | 4 | 6 | 6 | 1.18 | 1.55 | 0.37 | 569       |
| South Korea        | 45.37 | 5 | 3 | 0 | 2.07 | 2.45 | 0.38 | 11,344    |
| Oman               | 81.48 | 8 | 6 | 6 | 0.97 | 1.35 | 0.38 | 8,373     |
| Spain              | 11.11 | 0 | 0 | 0 | 2.02 | 2.40 | 0.38 | 236,769   |
| Dominican Republic | 81.48 | 7 | 3 | 5 | 1.55 | 1.96 | 0.41 | 15,723    |
| Israel             | 52.78 | 8 | 4 | 0 | 1.39 | 1.82 | 0.42 | 16,793    |
| China              | 8.33  | 0 | 0 | 0 | 2.32 | 2.75 | 0.43 | 84,106    |
| United States      | 11.11 | 5 | 1 | 0 | 1.83 | 2.28 | 0.45 | 1,699,933 |
| Sudan              | 81.48 | 8 | 4 | 6 | 1.09 | 1.57 | 0.48 | 4,146     |
| Djibouti           | 94.44 | 7 | 6 | 6 | 1.15 | 1.66 | 0.51 | 2,697     |
| Iran               | 18.52 | 0 | 3 | 1 | 1.87 | 2.40 | 0.54 | 141,591   |
| Germany            | 25.00 | 1 | 1 | 0 | 1.62 | 2.21 | 0.59 | 179,717   |
| Italy              | 69.91 | 6 | 5 | 5 | 1.74 | 2.36 | 0.62 | 231,139   |
| Turkey             | 58.33 | 6 | 3 | 3 | 1.78 | 2.59 | 0.81 | 158,762   |
| Bangladesh         | 87.04 | 6 | 6 | 6 | 1.25 | 2.20 | 0.96 | 38,292    |

SI is the Stringency Index, a composite index of physical distancing measures with a range of 0 to 100, calculated by the Oxford COVID-19 Government Response Tracker (OxCGRT); a larger value indicates higher stringency. TR refers to restrictions on international travel, MG refers to restrictions on mass gatherings, and LD refers to lockdown (see Table 1 for the specific measures). Predicted  $R_t$  is the average predicted time-varying reproduction number over the two weeks following the date of the 100<sup>th</sup> case, using a regression model. Estimated  $R_t$  is the estimated time-varying reproduction number using reported case data, averaged over the two weeks following the date of the 100<sup>th</sup> case.



**Figure S1. Schematic of methodology**

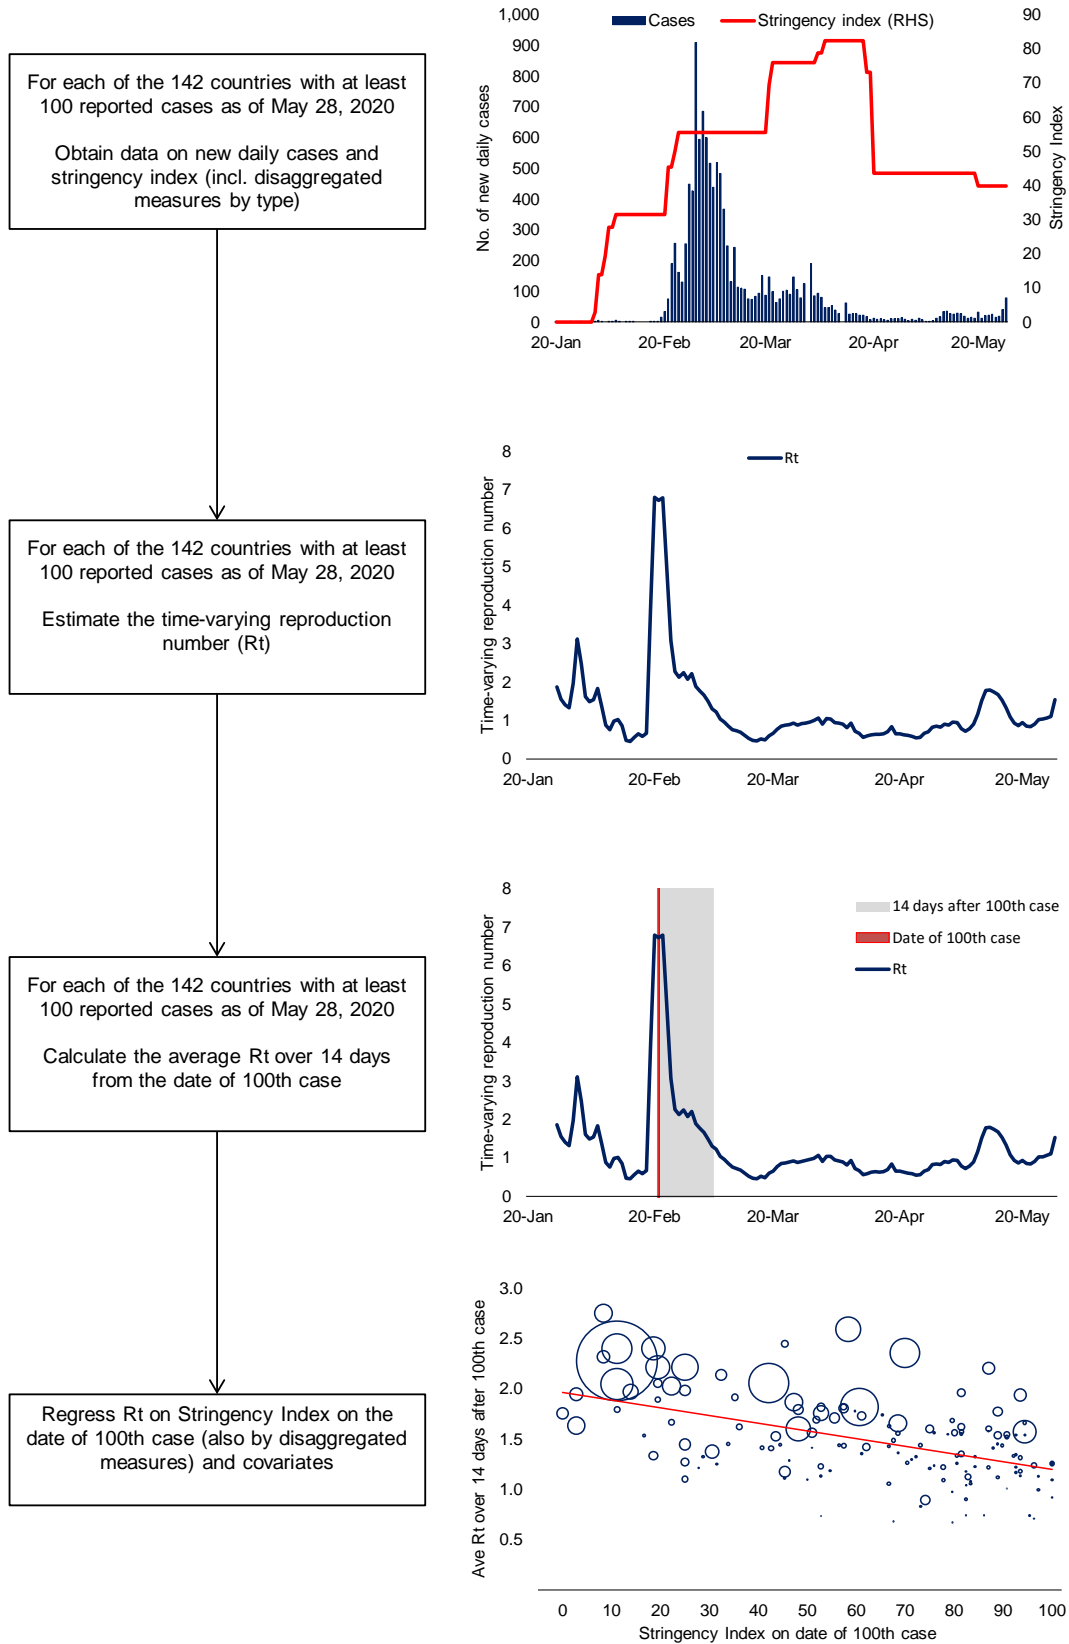

**Figure S2. Percent change in mobility on the date of the 100<sup>th</sup> case and average reproduction numbers in the following two weeks**

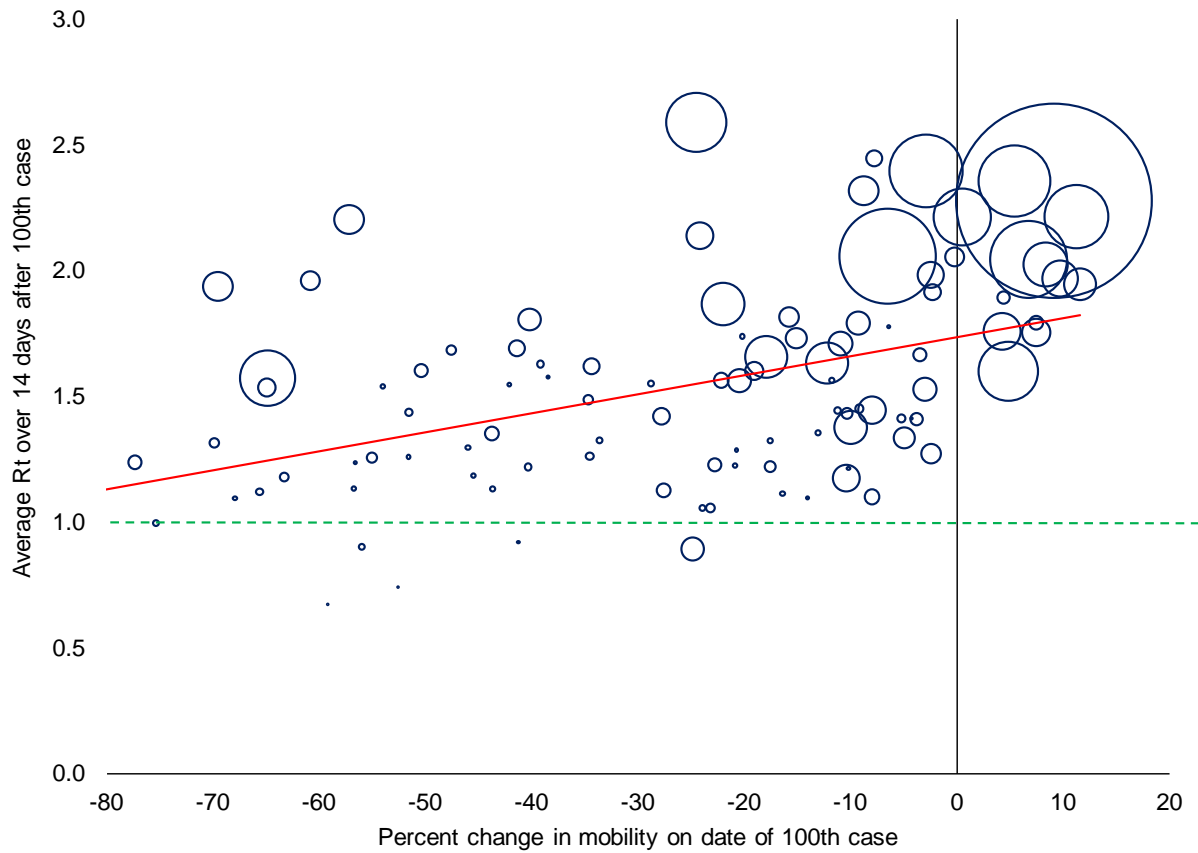

The time-varying reproduction number  $R_t$  is the expected number of secondary cases generated by a primary case at time  $t$ . The change in mobility (average of retail and recreation, grocery and pharmacy, parks, transit and workplaces) is relative to the baseline median value of the corresponding day of the week during January 3 to February 6, 2020; data for 103 countries from Google Community Mobility Trends Reports. Each bubble represents a country, and the size of the bubble is proportional to the total number of reported cases as of May 28, 2020. The red solid line is the best linear fit of the relationship between the stringency level on the date of the 100<sup>th</sup> reported case and the average  $R_t$  in the following two weeks. The green dashed line is the  $R_t$  threshold: a value below one indicates that a sustained outbreak is unlikely if the measures remain in place.
